# Supplementary material for: Voltammetry and Spectroelectrochemistry of TCNQ in Acetonitrile/RTIL Mixtures
Source: MDPI journal article supplement (doi:10.3390/molecules25020303), 2020-01-12

# Voltammetry and Spectroelectrochemistry of TCNQ in Acetonitrile/RTIL Mixtures

Abderrahman Atifi and Michael D. Ryan\*

Marquette University, Chemistry Department, PO Box 1881, Milwaukee, WI 53092 USA  
E-mail: [Michael.ryan@marquette.edu](mailto:Michael.ryan@marquette.edu)

Table of Contents.

Table S1. Cyclic voltammetry of TCNQ in mixtures of acetonitrile and BMImPF<sub>6</sub> or

|                                                                                                                                                          |   |
|----------------------------------------------------------------------------------------------------------------------------------------------------------|---|
| BMImBF <sub>4</sub> .....                                                                                                                                | 2 |
| Figure S1. Mixture of acetonitrile with 60% (v/v) BMImPF <sub>6</sub> .....                                                                              | 3 |
| Figure S2. Cyclic voltammetry of TCNQ in AmNTf <sub>2</sub> , BMImBF <sub>4</sub> , BMImPF <sub>6</sub> , BMImNTf <sub>2</sub> and<br>Acetonitrile ..... | 4 |
| Figure S3. Visible spectroelectrochemistry of TCNQ in acetonitrile .....                                                                                 | 5 |
| Figure S4. Infrared spectroelectrochemistry of TCNQ in THF .....                                                                                         | 6 |
| Figure S5. DFT structure of the tetramethylammonium-TCNQ <sup>2-</sup> ion pair .....                                                                    | 7 |

Table S1. Cyclic voltammetry of TCNQ in mixtures of acetonitrile and BMImPF<sub>6</sub> or BMImBF<sub>4</sub>. Acetonitrile solutions contained 0.10 M TBAP

Cyclic voltammetry of TCNQ in acetonitrile/BMImPF<sub>6</sub>

| %BMImPF <sub>6</sub> | E° <sub>1</sub> ,<br>V vs Ag/AgNO <sub>3</sub> | E° <sub>2</sub> ,<br>V vs Ag/AgNO <sub>3</sub> | ΔE°, mV |
|----------------------|------------------------------------------------|------------------------------------------------|---------|
| 0                    | -0.101                                         | -0.650                                         | 549     |
| 5                    | -0.113                                         | -0.642                                         | 530     |
| 10                   | -0.109                                         | -0.631                                         | 523     |
| 20                   | -0.106                                         | -0.615                                         | 509     |
| 33                   | -0.105                                         | -0.596                                         | 491     |
| 75                   | -0.102                                         | --                                             | --      |
| 100                  | -0.102                                         | -0.541                                         | 439     |

Cyclic voltammetry of TCNQ in acetonitrile/BMImBF<sub>4</sub>

| %BMImBF <sub>4</sub> | E° <sub>1</sub> ,<br>V vs Ag/AgNO <sub>3</sub> | E° <sub>2</sub> ,<br>V vs Ag/AgNO <sub>3</sub> | ΔE°, mV |
|----------------------|------------------------------------------------|------------------------------------------------|---------|
| 0                    | -0.096                                         | -0.645                                         | 549     |
| 5                    | -0.101                                         | -0.635                                         | 534     |
| 10                   | -0.103                                         | -0.626                                         | 524     |
| 20                   | -0.102                                         | -0.610                                         | 508     |
| 33                   | -0.100                                         | -0.593                                         | 494     |
| 50                   | -0.101                                         | -0.576                                         | 476     |
| 75                   | -0.101                                         | -0.557                                         | 456     |
| 100                  | -0.096                                         | -0.523                                         | 427     |

Figure S1. Mixture of acetonitrile with 60% (v/v) BMImPF<sub>6</sub>. Red: BMIm<sup>+</sup>, Green: PF<sub>6</sub><sup>-</sup>, Blue/white: acetonitrile. Adapted with permission from Acc. Chem. Res. (2007) 40, 1087-1096. Copyright 2007 American Chemical Society.

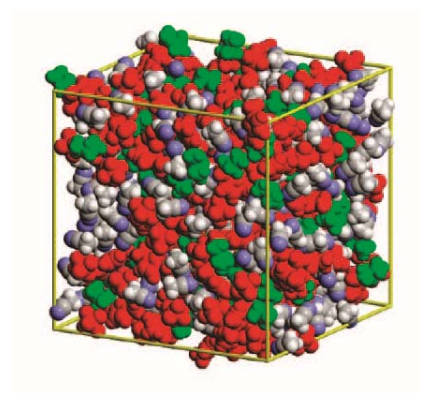

Figure S2. Cyclic voltammetry of TCNQ in AmNTf<sub>2</sub>, BMImBF<sub>4</sub>, BMImPF<sub>6</sub>, BMImNTf<sub>2</sub> and acetonitrile. Scan rate: 100 mV/s. Working electrode: Platinum. Acetonitrile contained 0.10 M TBAP

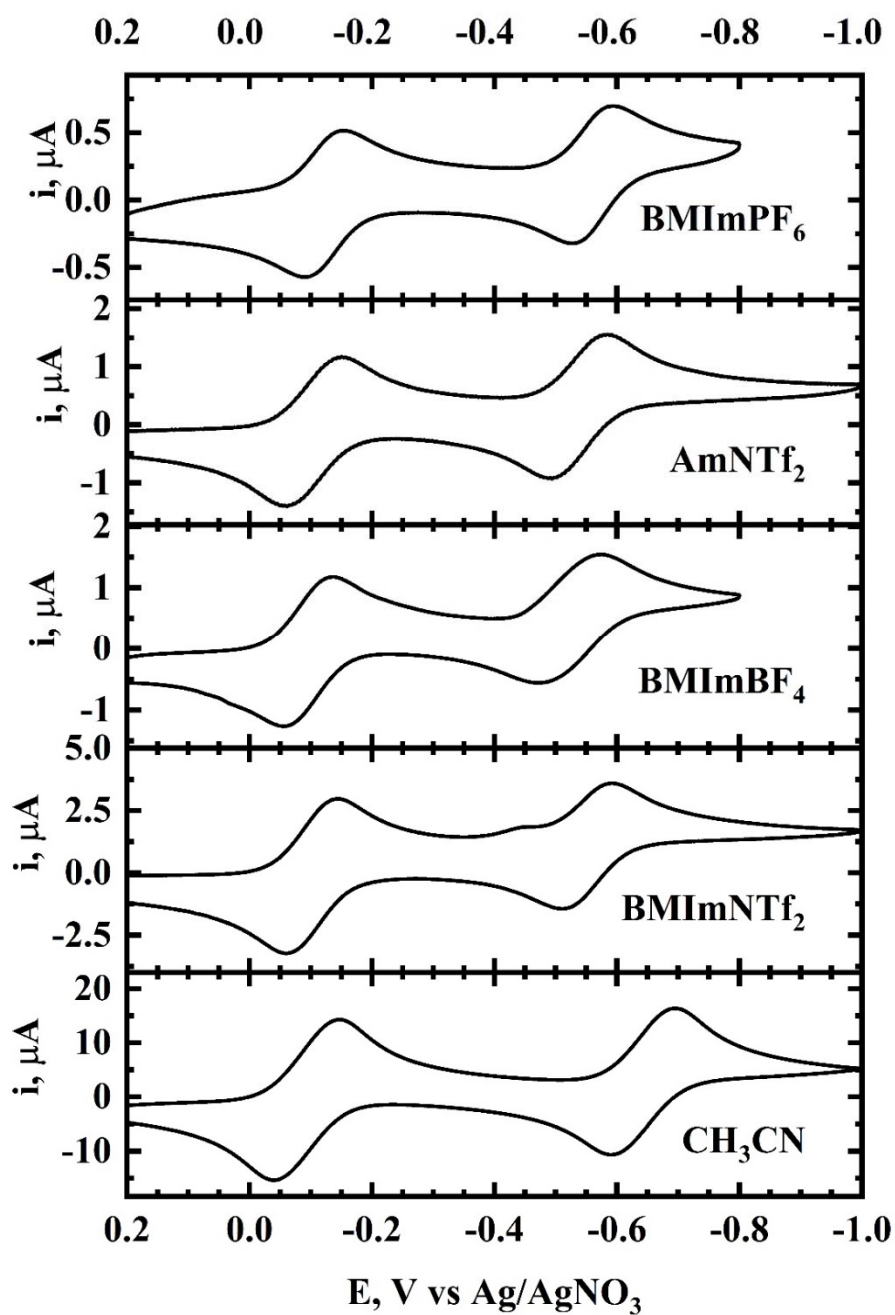

Figure S3. Visible spectroelectrochemistry of TCNQ in acetonitrile. A. First wave. B. Second wave. Electrolyte: 0.10 M TBAP

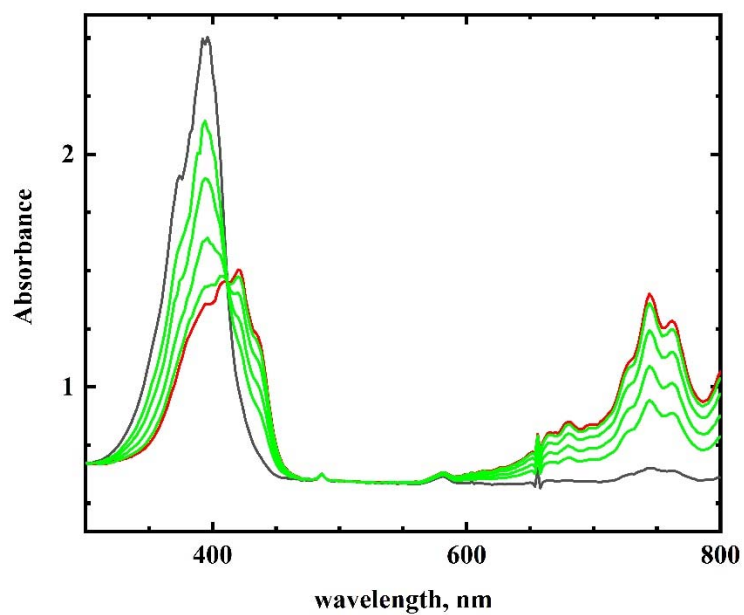

A

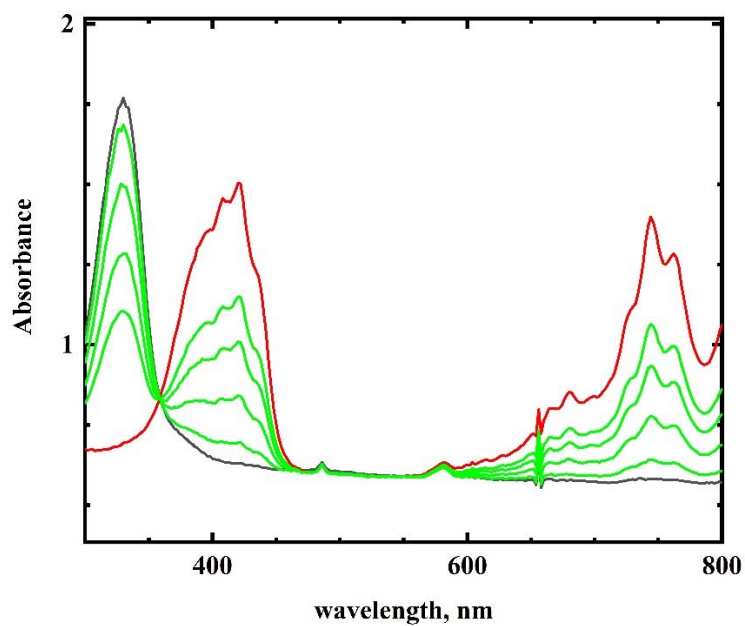

B

Figure S4. Infrared spectroelectrochemistry of TCNQ in THF. Initial difference spectrum (black); TCNQ $\cdot^-$  (blue); TCNQ $^{2-}$  (green); end of scan (red). Electrolyte: 0.10 M TBAP

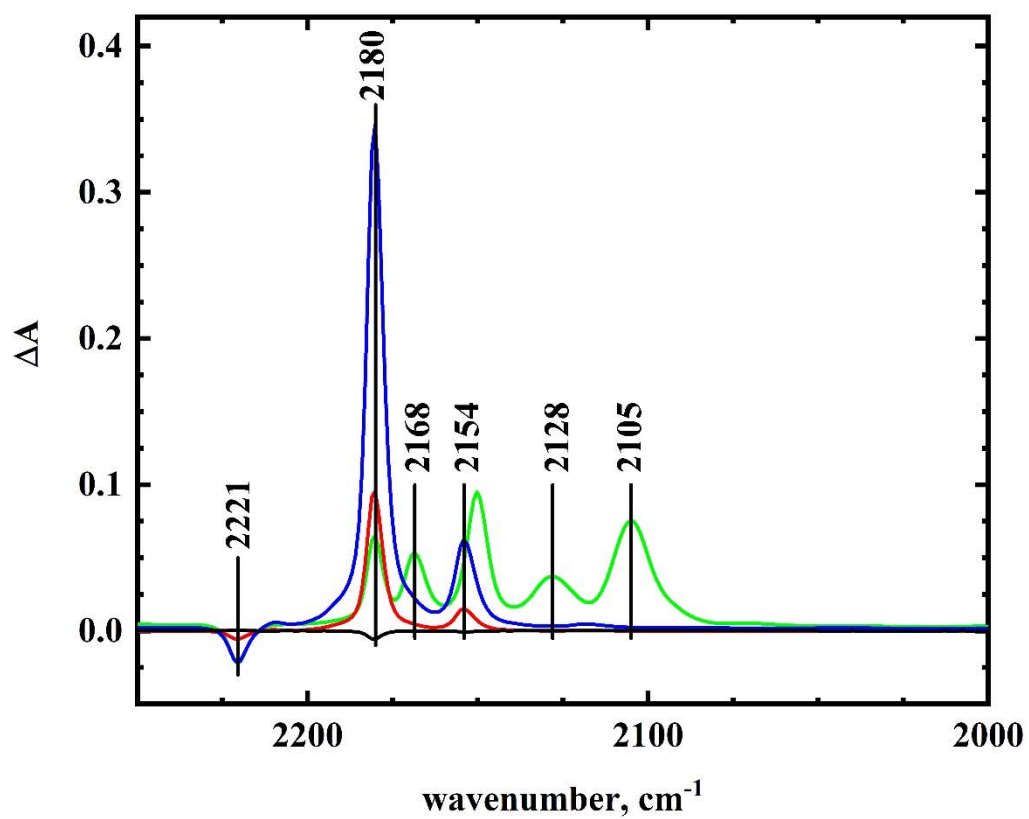

Figure S5. DFT structure of the tetramethylammonium-TCNQ<sup>2-</sup> ion pair. Gaussian 16.

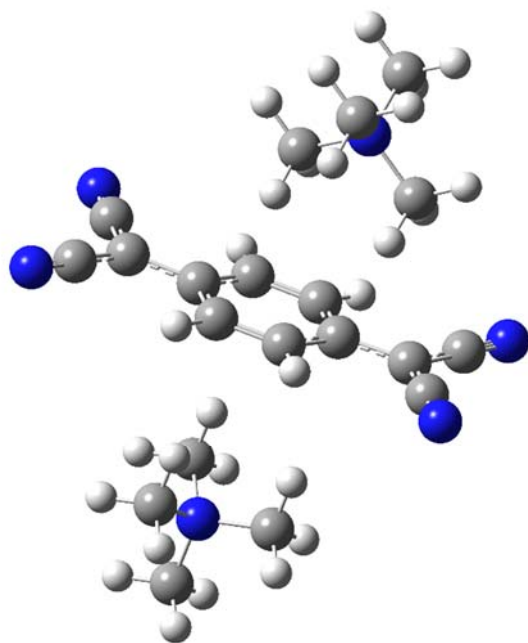

Supplement: s1 [file s1]
