# Supplementary material for: Voltammetry and Spectroelectrochemistry of TCNQ in Acetonitrile/RTIL Mixtures
Source: MDPI journal article supplement (doi:10.3390/molecules25020303), 2020-01-12
Supplement: s1 [file s1]

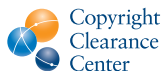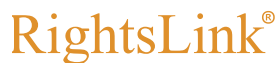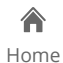

Home

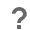

Help

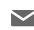

Email Support

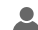

Sign in

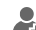

Create Account

## Molecular Solutes in Ionic Liquids: A Structural Perspective

**Author:** Agílio A. H. Pádua, Margarida F. Costa Gomes, José N. A. Canongia Lopes

**Publication:** Accounts of Chemical Research

**Publisher:** American Chemical Society

**Date:** Nov 1, 2007

*Copyright © 2007, American Chemical Society*

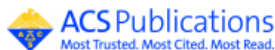

### PERMISSION/LICENSE IS GRANTED FOR YOUR ORDER AT NO CHARGE

This type of permission/license, instead of the standard Terms & Conditions, is sent to you because no fee is being charged for your order. Please note the following:

- Permission is granted for your request in both print and electronic formats, and translations.
- If figures and/or tables were requested, they may be adapted or used in part.
- Please print this page for your records and send a copy of it to your publisher/graduate school.
- Appropriate credit for the requested material should be given as follows: "Reprinted (adapted) with permission from (COMPLETE REFERENCE CITATION). Copyright (YEAR) American Chemical Society." Insert appropriate information in place of the capitalized words.
- One-time permission is granted only for the use specified in your request. No additional uses are granted (such as derivative works or other editions). For any other uses, please submit a new request.

If credit is given to another source for the material you requested, permission must be obtained from that source.

[BACK](#)[CLOSE WINDOW](#)
